# Supplementary material for: Joint Loads in Marsupial Ankles Reflect Habitual Bipedalism versus Quadrupedalism
Source: PLoS One. 2013 Mar 12;8(3):e58811. doi: 10.1371/journal.pone.0058811 (PMC3595237; doi:10.1371/journal.pone.0058811)
Supplement: Table S1 — Specimen information and raw data used in analyses. (XLS) [file pone.0058811.s001.xls]

## Sheet: SPSS conversion to Excel
Specimen_number	Museum	Genus	Species	Gait_group	tmax_pixel	tsec_pixel	tthird_pixel	tfour_pixel	tfive_pixel	tsix_pixel	tseven_pixel	tmin_pixel	total_pixel	tmax_totalpix	tsec_totalpix	tthird_totalpix	tfour_totalpix	tfive_totalpix	tsix_totalpix	tseven_totalpix	tmin_totalpix
A02534	Tasmanian Museum	Macropus	giganteus	bipedal	40583	23447	6038	1070	458	8	0	1	71605	0.5668	0.3274	0.0843	0.0149	0.0064	0.0001	0	0
JM11525	Queensland Museum	Macropus	giganteus	bipedal	13588	17178	9197	969	0	0	0	2	40934	0.3319	0.4197	0.2247	0.0237	0	0	0	0
M01371	Australian National Wildlife Collection	Macropus	giganteus	bipedal	1861	19909	13701	4347	1481	11	1	6	41317	0.045	0.4819	0.3316	0.1052	0.0358	0.0003	0	0.0001
M01377	Australian National Wildlife Collection	Macropus	giganteus	bipedal	16510	22189	3557	315	0	0	0	17	42588	0.3877	0.521	0.0835	0.0074	0	0	0	0.0004
M37256	Australian Museum	Macropus	giganteus	bipedal	13993	53370	14848	6031	396	2	0	1	88641	0.1579	0.6021	0.1675	0.068	0.0045	0	0	0
M01378	Australian National Wildlife Collection	Macropus	fuliginosus	bipedal	3027	28550	6086	1735	44	0	1	4	39447	0.0767	0.7238	0.1543	0.044	0.0011	0	0	0.0001
M01384	Australian National Wildlife Collection	Macropus	fuliginosus	bipedal	9050	22532	17032	16661	742	46	3	4	66070	0.137	0.341	0.2578	0.2522	0.0112	0.0007	0	0.0001
M19005	Australian National Wildlife Collection	Macropus	eugenii	bipedal	3349	32522	4674	103	2	6	1	40	40697	0.0823	0.7991	0.1148	0.0025	0	0.0001	0	0.001
M39728	Australian Museum	Macropus	eugenii	bipedal	8414	21050	2222	622	391	244	11	39	32993	0.255	0.638	0.0673	0.0189	0.0119	0.0074	0.0003	0.0012
M41165	Australian Museum	Macropus	eugenii	bipedal	6084	21401	9958	899	83	0	0	19	38444	0.1583	0.5567	0.259	0.0234	0.0022	0	0	0.0005
M41259	Australian Museum	Macropus	eugenii	bipedal	4285	10618	24757	1925	311	12	0	5	41913	0.1022	0.2533	0.5907	0.0459	0.0074	0.0003	0	0.0001
M37503	Australian Museum	Macropus	parma	bipedal	2600	22769	7433	904	282	95	0	11	34094	0.0763	0.6678	0.218	0.0265	0.0083	0.0028	0	0.0003
M23543	Australian Museum	Wallabia	bicolor	bipedal	18615	30985	6766	2275	659	494	445	777	61016	0.3051	0.5078	0.1109	0.0373	0.0108	0.0081	0.0073	0.0127
M34335	Australian Museum	Wallabia	bicolor	bipedal	21750	33943	8758	2906	1078	602	493	924	70454	0.3087	0.4818	0.1243	0.0412	0.0153	0.0085	0.007	0.0131
M15609	Australian National Wildlife Collection	Dendrolagus	dorianus	arboreal quadrupedal	1411	7109	23329	12778	4336	511	6	3	49483	0.0285	0.1437	0.4715	0.2582	0.0876	0.0103	0.0001	0.0001
JM06548	Queensland Museum	Dendrolagus	lumholtzi	arboreal quadrupedal	119	11036	12474	520	0	0	0	13	24162	0.0049	0.4568	0.5163	0.0215	0	0	0	0.0005
JM03835	Queensland Museum	Phascolarctos	cinereus	arboreal quadrupedal	0	2331	4791	3363	2273	75	0	0	12833	0	0.1816	0.3733	0.2621	0.1771	0.0058	0	0
JM15156	Queensland Museum	Phascolarctos	cinereus	arboreal quadrupedal	2247	4427	1582	606	292	50	54	163	9421	0.2385	0.4699	0.1679	0.0643	0.031	0.0053	0.0057	0.0173
M05190	Australian Museum	Phascolarctos	cinereus	arboreal quadrupedal	0	313	13439	7644	2058	307	189	420	24370	0	0.0128	0.5515	0.3137	0.0844	0.0126	0.0078	0.0172
M16808	Australian National Wildlife Collection	Phascolarctos	cinereus	arboreal quadrupedal	16275	13140	7949	5243	2477	729	93	332	46238	0.352	0.2842	0.1719	0.1134	0.0536	0.0158	0.002	0.0072
M16809	Australian National Wildlife Collection	Phascolarctos	cinereus	arboreal quadrupedal	7131	12128	8698	4622	2578	1187	178	320	36842	0.1936	0.3292	0.2361	0.1255	0.07	0.0322	0.0048	0.0087
M23629	Australian Museum	Phascolarctos	cinereus	arboreal quadrupedal	119	7641	14264	7059	1510	313	162	449	31517	0.0038	0.2424	0.4526	0.224	0.0479	0.0099	0.0051	0.0142
M26825	Australian Museum	Phascolarctos	cinereus	arboreal quadrupedal	134	6086	16503	8117	1219	92	112	275	32538	0.0041	0.187	0.5072	0.2495	0.0375	0.0028	0.0034	0.0085
M35240	Australian Museum	Phascolarctos	cinereus	arboreal quadrupedal	3119	13904	6626	3926	869	299	94	233	29070	0.1073	0.4783	0.2279	0.1351	0.0299	0.0103	0.0032	0.008
M38689	Australian Museum	Phascolarctos	cinereus	arboreal quadrupedal	2950	8946	13260	6662	1158	307	169	416	33868	0.0871	0.2641	0.3915	0.1967	0.0342	0.0091	0.005	0.0123
JM08743	Queensland Museum	Trichosurus	vulpecula	arboreal quadrupedal	0	3032	2437	990	193	107	81	206	7046	0	0.4303	0.3459	0.1405	0.0274	0.0152	0.0115	0.0292
JM08850	Queensland Museum	Trichosurus	vulpecula	arboreal quadrupedal	743	3035	803	174	109	74	90	209	5237	0.1419	0.5795	0.1533	0.0332	0.0208	0.0141	0.0172	0.0399
M12912	Australian National Wildlife Collection	Trichosurus	vulpecula	arboreal quadrupedal	3772	12180	10161	5759	3069	1161	323	367	36792	0.1025	0.3311	0.2762	0.1565	0.0834	0.0316	0.0088	0.01
M35010	Australian Museum	Trichosurus	vulpecula	arboreal quadrupedal	0	1369	10225	4240	571	77	82	263	16827	0	0.0814	0.6077	0.252	0.0339	0.0046	0.0049	0.0156
S01127	Australian Museum	Trichosurus	vulpecula	arboreal quadrupedal	0	1220	5864	2015	463	276	138	309	10285	0	0.1186	0.5702	0.1959	0.045	0.0268	0.0134	0.03
S01851	Australian Museum	Trichosurus	vulpecula	arboreal quadrupedal	2239	6887	7345	3185	1118	329	205	499	21807	0.1027	0.3158	0.3368	0.1461	0.0513	0.0151	0.0094	0.0229
J14051	Queensland Museum	Lasiorhinus	krefftii	terrestrial quadrupedal	3071	14839	5180	1455	117	0	0	0	24662	0.1245	0.6017	0.21	0.059	0.0047	0	0	0
JM05251	Queensland Museum	Lasiorhinus	krefftii	terrestrial quadrupedal	3178	14018	3140	656	8	0	0	5	21005	0.1513	0.6674	0.1495	0.0312	0.0004	0	0	0.0002
J22837	Queensland Museum	Lasiorhinus	latifrons	terrestrial quadrupedal	0	1258	7247	3071	1599	264	0	4	13443	0	0.0936	0.5391	0.2284	0.1189	0.0196	0	0.0003
S01605	Tasmanian Museum	Sarcophilus	harrisii	terrestrial quadrupedal	0	4695	10274	8734	5006	1220	263	581	30773	0	0.1526	0.3339	0.2838	0.1627	0.0396	0.0085	0.0189
A00297	Tasmanian Museum	Thylacinus	cynocephalus	terrestrial quadrupedal	4655	13872	4415	2682	158	154	153	603	26692	0.1744	0.5197	0.1654	0.1005	0.0059	0.0058	0.0057	0.0226
A00300	Tasmanian Museum	Thylacinus	cynocephalus	terrestrial quadrupedal	5236	10826	8818	4127	2509	489	178	285	32468	0.1613	0.3334	0.2716	0.1271	0.0773	0.0151	0.0055	0.0088
A00890	Tasmanian Museum	Thylacinus	cynocephalus	terrestrial quadrupedal	2098	6870	13202	7038	2230	724	83	277	32522	0.0645	0.2112	0.4059	0.2164	0.0686	0.0223	0.0026	0.0085
A01258	Tasmanian Museum	Vombatus	ursinus	terrestrial quadrupedal	1	3595	10667	4224	1172	707	278	219	20863	0	0.1723	0.5113	0.2025	0.0562	0.0339	0.0133	0.0105
JM06578	Queensland Museum	Vombatus	ursinus	terrestrial quadrupedal	51	10130	5717	2009	1169	519	172	421	20188	0.0025	0.5018	0.2832	0.0995	0.0579	0.0257	0.0085	0.0209
M10000	Australian National Wildlife Collection	Vombatus	ursinus	terrestrial quadrupedal	11111	28479	18775	8570	3967	1750	713	709	74074	0.15	0.3845	0.2535	0.1157	0.0536	0.0236	0.0096	0.0096
